# Supplementary material for: Brown adipose tissue regulates glucose homeostasis and insulin sensitivity
Source: JCI journal article supplement (doi:10.1172/jci62308), 2012-12-10

**Supplemental Figure 1. BAT transplantation decreases body weight, fat mass, and effects metabolic parameters.** (A-D) Male C57BL/6 mice were transplanted with 0.1g BAT into the visceral cavity. Mice were studied at indicated times post-transplantation. (A), Body weight, (B) fat mass, (C) lean mass, and (D) food intake. Data are means  $\pm$  s.e.m. Asterisks represent statistically significant differences between 0.1g BAT and control groups (n=8-24/group; \* $P$ <0.05). (E-G) At 12 weeks post-transplantation mice were housed in metabolic cages for 48 hours. Data are expressed as AUC for (E) Total energy expenditure, (F) Activity, and (G) RER. Data are means  $\pm$  s.e.m. Asterisks indicate a significant difference between 0.1g BAT and control groups (n=9-15/group; \* $P$ <0.05). (H) GTT of mice transplanted with 0.1g BAT into the Visceral and Subcutaneous cavity (n=8/group). (I-J) Quantitation of western blots of BAT transplanted into Visceral and Subcutaneous cavity to determine (I) vascularization measured by CD31 and (J) innervation measured by tyrosine hydroxylase (TH). Data are means  $\pm$  s.e.m. (n=6/group; \*\* $P$ <0.01). (K) GTT of mice receiving autonomous transplanted BAT. Data are means  $\pm$  s.e.m. (n=4/group; \* $P$ <0.05 0.1g BAT transplant vs. Sham; # $P$ <0.05 autonomous BAT transplant vs. Sham).

**Supplemental Figure 2. BAT transplantation increases visceral white adipose tissue GLUT1, decreases adipocyte size, and does not change histology of heart.** A, Mice were transplanted with 0.1g BAT or Sham-operated and GLUT1 was measured 12 weeks post-transplantation. GLUT1 protein was significantly increased in the visceral WAT of the mice transplanted with 0.1g BAT compared to Sham 12 weeks post-transplantation. Data are means  $\pm$  s.e.m. (n=8/group; \*\*\* $P$ <0.001). B-C, Basal glycogen content was significantly increased in mice transplanted with 0.1g BAT compared to Sham-operated mice when normalized per mg of tissue weight (B), and trended to be increased when normalized for total fat mass (C) ( $P$ =0.07). Data are means  $\pm$  s.e.m. (n=5/group; \*\* $P$ <0.01). (D-F) Mice were transplanted with 0.1g BAT

or were Sham-operated and 12 weeks following transplantation hemotoxylin and eosin (H&E) staining of visceral WAT was performed in (D) adipocyte size was measured on the H&E slides with ImageJ software with three sections of three slides per animal. Sham and (E) 0.1g BAT-transplanted mice and (F). Data are means  $\pm$  s.e.m. (n=6/group, \*\* $P$ <0.01). (G) Cross sections of the hearts of mice that were either Sham-operated or transplanted with 0.1g BAT were taken and H&E stains were performed 12 weeks post-transplantation. No difference was observed in general heart histology or morphology between groups (n=6/group).

**Supplemental Figure 3. Concentration of FGF21 in *Il-6*<sup>-/-</sup> mice. (A-B).** FGF21 was measured in the liver of 12-wk old wild-type (WT) and *Il-6*<sup>-/-</sup> mice at room temperature (A) and serum FGF21 was measured after 24h cold exposure (4<sup>0</sup>C) (B). Data are means  $\pm$  s.e.m. (n=3-6/group; \* $P$ <0.05)

**Supplemental Figure 4. Characterization of transplanted (transplanted) BAT. (A-B)** At 12 weeks post-transplantation, awake mice were housed at 4<sup>0</sup>C and body temperature measured. Data are means  $\pm$  s.e.m. (n=6/group; \* $P$ <0.05 compared to Sham). (C-D) H&E stains of transplanted BAT at 2 and 12 weeks post-transplantation. (C) Arrows indicate the presence of some multilocular droplets at 2 weeks, which are absent at 12 weeks. (D) H&E staining of endogenous BAT from Sham and BAT-transplanted mice. (E) Tyrosine hydroxylase was measured by qPCR. (n=6/group). (F-G), Immunofluorescence of transplanted BAT 12 weeks post-transplantation of (F) tyrosine hydroxylase and (G) UCP1. Data are displayed with (+) and without (-) primary antibody. (H) Glucose uptake in transplanted BAT from mice transplanted with 0.1g or 0.4g BAT. (n=6/group; \* $P$ <0.05 compared to Basal).

**Supplementary Table 1. Muscle and liver triglyceride content.** Mice were sham-operated (Sham) or transplanted with 0.1g BAT and studied 12 weeks post-transplantation. Data are means  $\pm$  s.e.m. (n=5/group).

|                                    | <b>Sham</b>    | <b>0.1g BAT</b> | <b>P Value</b> |
|------------------------------------|----------------|-----------------|----------------|
| <b>Muscle Triglycerides (mg/g)</b> | 12.4 $\pm$ 1.3 | 10.1 $\pm$ 0.6  | P=0.12         |
| <b>Liver Triglycerides (mg/g)</b>  | 26.7 $\pm$ 2.9 | 21.9 $\pm$ 2.9  | P=0.30         |

**Supplementary Table 2. Blood pressure and heart rate.** Mice were sham-operated (Sham) or transplanted with 0.1g BAT and studied 12 weeks post-transplantation. Data are means  $\pm$  s.e.m. (n=12/group).

|                                        | <b>Sham</b>  | <b>0.1g BAT</b> | <b>P Value</b> |
|----------------------------------------|--------------|-----------------|----------------|
| <b>Resting Heart Rate (beats/min)</b>  | 612 $\pm$ 18 | 625 $\pm$ 22    | P=0.66         |
| <b>Systolic Blood Pressure (mmHg)</b>  | 102 $\pm$ 2  | 106 $\pm$ 3     | P=0.27         |
| <b>Diastolic Blood Pressure (mmHg)</b> | 74 $\pm$ 3   | 78 $\pm$ 2      | P=0.32         |

**Supplementary Table 3. Circulating hormone and lipid levels.** Mice were sham-operated (Sham) or transplanted with 0.1g or 0.4g BAT and studied 12 weeks post-transplantation. Data are means  $\pm$  s.e.m. (n=23, 23, and 9 for Sham, 0.1g BAT, and 0.4g BAT). Asterisks indicate statistical significance compared to Sham (\* $P$ <0.05, \*\* $P$ <0.01).

|                                           | <b>Sham</b>     | <b>0.1g BAT</b>  | <b>0.4g BAT</b>  | <b>P Value</b> |
|-------------------------------------------|-----------------|------------------|------------------|----------------|
| <b>Insulin (ng/mL)</b>                    | 0.61 $\pm$ 0.13 | 0.37 $\pm$ 0.06* | 0.38 $\pm$ 0.05* | P=0.03         |
| <b>Cholesterol (mg/dL)</b>                | 132 $\pm$ 12    | 104 $\pm$ 6*     | 121 $\pm$ 10     | P=0.04         |
| <b>Triglycerides (mg/dL)</b>              | 83.0 $\pm$ 20   | 66.7 $\pm$ 7.2   | 71.1 $\pm$ 9.8   | P=0.67         |
| <b>Free Fatty Acid (mEq/mL)</b>           | 0.74 $\pm$ 0.13 | 0.54 $\pm$ 0.04  | 0.51 $\pm$ 0.09  | P=0.28         |
| <b>Adiponectin (<math>\mu</math>g/mL)</b> | 10.6 $\pm$ 1.1  | 8.9 $\pm$ 1.0    | 8.2 $\pm$ 1.4    | P=0.27         |
| <b>Leptin (ng/mL)</b>                     | 9.8 $\pm$ 0.9   | 6.4 $\pm$ 0.7**  | 4.5 $\pm$ 0.8**  | P=0.007        |
| <b>T3 (ng/mL)</b>                         | 1.7 $\pm$ 0.5   | 1.4 $\pm$ 0.1    | n.d.             | P=0.68         |
| <b>TNF-<math>\alpha</math> (pg/mL)</b>    | 16 $\pm$ 4      | 13 $\pm$ 3       | 14 $\pm$ 5       | P=0.86         |
| <b>Norepinephrine (ng/mL)</b>             | 2.0 $\pm$ 0.3   | 4.3 $\pm$ 0.6**  | 3.3 $\pm$ 0.6*   | P=0.01         |

**Supplementary Table 4. Characterization of endogenous brown adipose tissue and transplanted brown adipose tissue.** Citrate synthase are results of enzyme activity assay; all other data are protein expression determined by Western blotting. Mice were sham-operated (Sham mice) or transplanted with 0.1g BAT (BAT mice) and studied 12 weeks post-transplantation. Data are mean  $\pm$  s.e.m. (n=4-6/group; \* $P$ <0.05, \*\* $P$ <0.01). Asterisks indicate statistical significance compared to endogenous BAT.

|                                          | Endogenous BAT |                | Transplanted BAT | P Value                 |
|------------------------------------------|----------------|----------------|------------------|-------------------------|
|                                          | Sham mice      | BAT mice       |                  |                         |
| <b>Citrate Synthase</b><br>(nmol/mg/min) | 2641 $\pm$ 103 | 2590 $\pm$ 46  | 1135 $\pm$ 27**  | P=0.0001 vs. endogenous |
| <b>Glut1</b> (A.U.)                      | 17.9 $\pm$ 0.9 | 18.3 $\pm$ 0.6 | 19.4 $\pm$ 0.8   | P=0.70                  |
| <b>Glut4</b> (A.U.)                      | 16.9 $\pm$ 1.1 | 16.3 $\pm$ 1.2 | 14.2 $\pm$ 2.6   | P=0.69                  |
| <b>UCP1</b> (A.U.)                       | 39.3 $\pm$ 3.9 | 39.9 $\pm$ 5.8 | 29.8 $\pm$ 6.2   | P=0.06 vs. endogenous   |
| <b>PRDM16</b> (A.U.)                     | 53.8 $\pm$ 2.9 | 50.6 $\pm$ 4.2 | 37.0 $\pm$ 1.1*  | P=0.02 vs. endogenous   |
| <b>CD36</b> (A.U.)                       | 16.4 $\pm$ 0.6 | 19.3 $\pm$ 0.6 | 14.1 $\pm$ 1.3   | P=0.83                  |
| <b>ACC</b> (A.U.)                        | 24.7 $\pm$ 0.4 | 26.6 $\pm$ 1.5 | 21.6 $\pm$ 3.8   | P=0.67                  |
| <b>eNOS</b> (A.U.)                       | 39.0 $\pm$ 2.7 | 42.4 $\pm$ 2.6 | n.d.             | P=0.41                  |
| <b>Stat3</b> (A.U.)                      | 19.5 $\pm$ 4.0 | 22.4 $\pm$ 3.9 | n.d.             | P=0.62                  |
| <b>pStat3</b> (A.U.)                     | 13.8 $\pm$ 0.6 | 15.4 $\pm$ 2.9 | n.d.             | P=0.61                  |

**Supplementary Table 5. Characterization of visceral white adipose tissue.** Citrate synthase are results of enzyme activity assay; all other data are protein expression determined by Western blotting. Mice were sham-operated (Sham) or transplanted with 0.1g BAT and studied 12 weeks post-transplantation. Data are means  $\pm$  s.e.m. (n=4-6/group; \* $P$ <0.05, \*\* $P$ <0.01).

|                                       | <b>Sham</b>     | <b>0.1g BAT</b>  | <b>P Value</b> |
|---------------------------------------|-----------------|------------------|----------------|
| <b>Citrate Synthase</b> (nmol/mg/min) | 11.6 $\pm$ 1.0  | 18.1 $\pm$ 2.0*  | P=0.05         |
| <b>Glut1</b> (A.U.)                   | 6.1 $\pm$ 1.2   | 22.8 $\pm$ 4.4** | P=0.01         |
| <b>Glut4</b> (A.U.)                   | 11.3 $\pm$ 0.8  | 11.8 $\pm$ 0.6   | P=0.65         |
| <b>UCP1</b> (A.U.)                    | 11.8 $\pm$ 1.3  | 14.6 $\pm$ 0.8   | P=0.08         |
| <b>PRDM16</b> (A.U.)                  | 22.6 $\pm$ 1.8  | 24.6 $\pm$ 2.6   | P=0.82         |
| <b>CD36</b> (A.U.)                    | 21.5 $\pm$ 1.3  | 22.5 $\pm$ 0.8   | P=0.51         |
| <b>FATP1</b> (A.U.)                   | 7.1 $\pm$ 5.3   | 14.0 $\pm$ 1.9   | P=0.19         |
| <b>ACC</b> (A.U.)                     | 11.5 $\pm$ 6.5  | 9.3 $\pm$ 1.0    | P=0.71         |
| <b>COX4</b> (A.U.)                    | 22.8 $\pm$ 0.6  | 18.3 $\pm$ 5.4   | P=0.61         |
| <b>eNOS</b> (A.U.)                    | 35.1 $\pm$ 0.8  | 36.8 $\pm$ 2.5   | P=0.66         |
| <b>Stat3</b> (A.U.)                   | 15.9 $\pm$ 3.8  | 20.3 $\pm$ 1.2   | P=0.34         |
| <b>pStat3</b> (A.U.)                  | 33.4 $\pm$ 10.3 | 41.9 $\pm$ 28.4  | P=0.79         |

**Supplementary Table 6. Characterization of heart tissue.** Mice were sham-operated (Sham) or transplanted with 0.1g BAT and studied 12 weeks post-transplantation. Data are protein expression determined by Western blotting, and are expressed mean  $\pm$  s.e.m (n=4-6/group; (\*\* $P < 0.01$ )).

|                     | <b>Sham</b>     | <b>0.1g BAT</b>  | <b>P Value</b> |
|---------------------|-----------------|------------------|----------------|
| <b>Glut1</b> (A.U.) | 15.7 $\pm$ 0.4  | 17.8 $\pm$ 0.5** | P=0.008        |
| <b>Glut4</b> (A.U.) | 18.6 $\pm$ 0.4  | 18.5 $\pm$ 0.7   | P=0.92         |
| <b>UCP1</b> (A.U.)  | 14.9 $\pm$ 2.2  | 15.1 $\pm$ 0.5   | P=0.90         |
| <b>CD36</b> (A.U.)  | 17.4 $\pm$ 0.2  | 16.3 $\pm$ 2.1   | P=0.82         |
| <b>FATP1</b> (A.U.) | 55.0 $\pm$ 15.1 | 69.0 $\pm$ 23.4  | P=0.59         |
| <b>ACC</b> (A.U.)   | 18.0 $\pm$ 2.1  | 19.9 $\pm$ 0.6   | P=0.33         |
| <b>COX4</b> (A.U.)  | 24.5 $\pm$ 0.1  | 24.5 $\pm$ 0.1   | P=0.49         |



**Supplementary Table 7. Characterization of gastrocnemius tissue.** Mice were sham-operated (Sham) or transplanted with 0.1g BAT and studied 12 weeks post-transplantation. Data are protein expression determined by Western blotting, and are expressed mean  $\pm$  s.e.m. (n=4-6/group).

|                     | <b>Sham</b>    | <b>0.1g BAT</b> | <b>P Value</b> |
|---------------------|----------------|-----------------|----------------|
| <b>Glut1</b> (A.U.) | 22.3 $\pm$ 0.4 | 22.4 $\pm$ 0.1  | P=0.91         |
| <b>Glut4</b> (A.U.) | 22.2 $\pm$ 0.3 | 22.3 $\pm$ 0.1  | P=0.89         |
| <b>UCP1</b> (A.U.)  | 18.9 $\pm$ 1.7 | 19.1 $\pm$ 0.7  | P=0.90         |
| <b>CD36</b> (A.U.)  | 12.5 $\pm$ .9  | 13.3 $\pm$ 1.4  | P=0.62         |
| <b>FATP1</b> (A.U.) | 10.1 $\pm$ 0.2 | 10.8 $\pm$ 0.5  | P=0.07         |
| <b>ACC</b> (A.U.)   | 19.3 $\pm$ 0.9 | 18.1 $\pm$ 1.0  | P=0.41         |
| <b>COX4</b> (A.U.)  | 24.4 $\pm$ 0.3 | 23.9 $\pm$ 0.5  | P=0.58         |

**Supplementary Table 8. Characteristics of mice transplanted with transplanted BAT from WT and *Il-6*<sup>-/-</sup> mice.** Mice were sham-operated (Sham) or transplanted with 0.1g WT BAT or 0.1g *Il-6*<sup>-/-</sup> BAT and studied 12 weeks post-transplantation. Data are mean ± s.e.m.; (n=6/group). Asterisks represent statistical significance compared to both Sham and 0.1g *Il6*<sup>-/-</sup> BAT (\**P*<0.05; \*\**P*<0.01) with the exception of norepinephrine, where 0.1g WT BAT vs. 0.1g *Il6*<sup>-/-</sup> BAT *P*=0.07.

|                               | Sham      | 0.1g WT BAT | 0.1g <i>Il6</i> <sup>-/-</sup> BAT | P Value                        |
|-------------------------------|-----------|-------------|------------------------------------|--------------------------------|
| <b>IL-6 (pg/mL)</b>           | 0.2 ± 0.1 | 8 ± 5*      | 1.4 ± 0.6                          | <i>P</i> <0.05                 |
| <b>Norepinephrine (ng/mL)</b> | 3.4 ± 0.6 | 6.0 ± 0.4** | 4.9 ± 0.3                          | <i>P</i> <0.01; <i>P</i> =0.07 |
| <b>% Fat Mass</b>             | 32 ± 2    | 28 ± 2*     | 35 ± 1                             | <i>P</i> <0.05                 |
| <b>% Lean Mass</b>            | 68 ± 2    | 72 ± 1*     | 67 ± 2                             | <i>P</i> <0.05                 |

Supplemental Figure 1

A

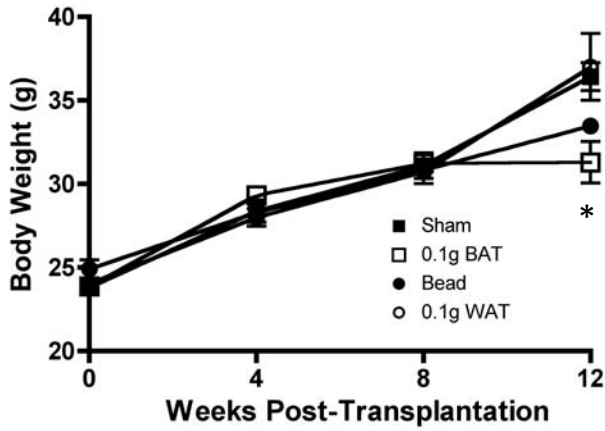

B

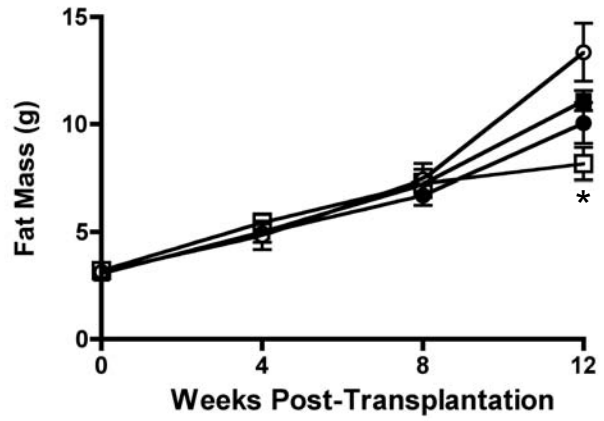

C

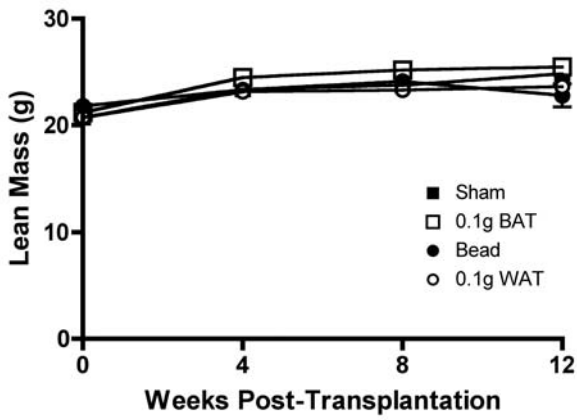

D

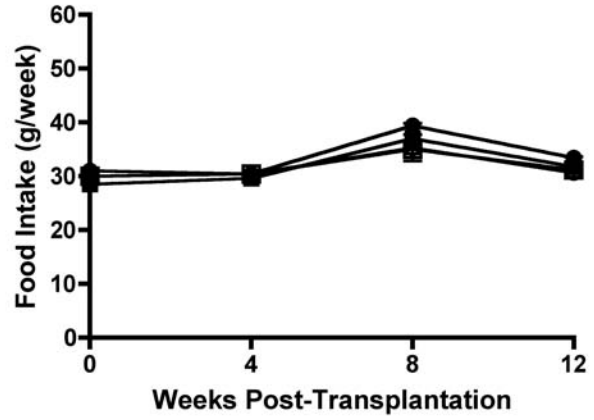

E

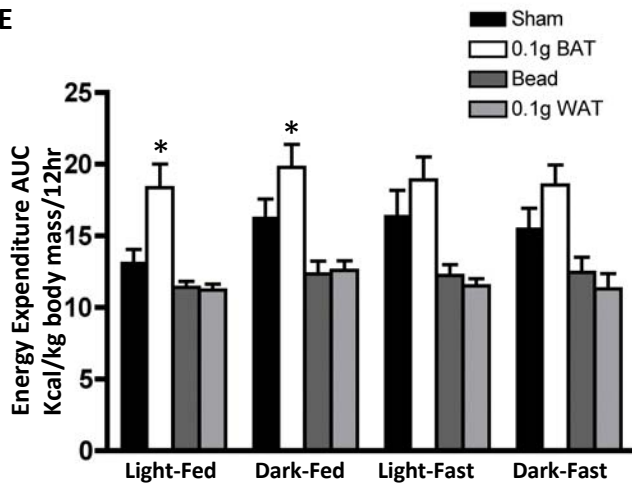

F

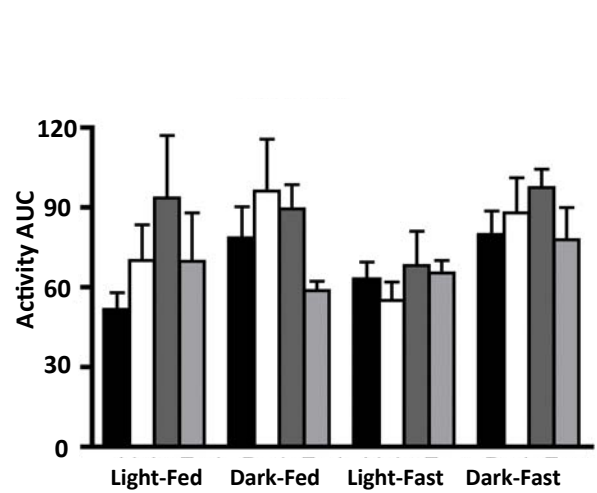

Supplemental Figure 1

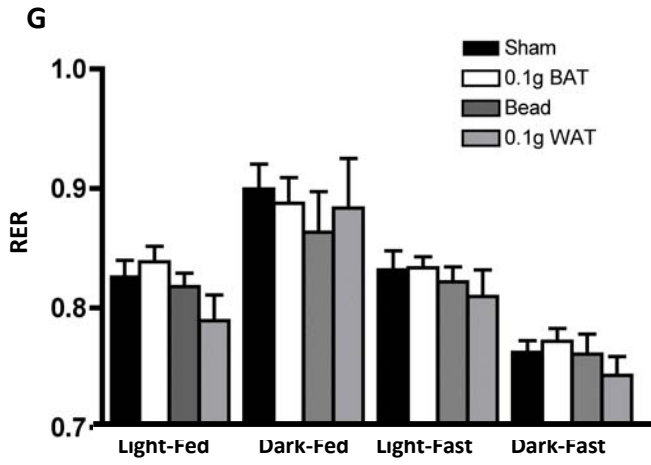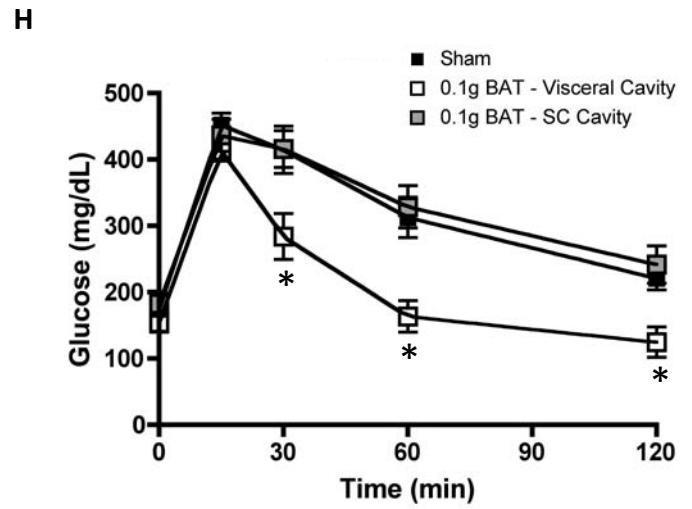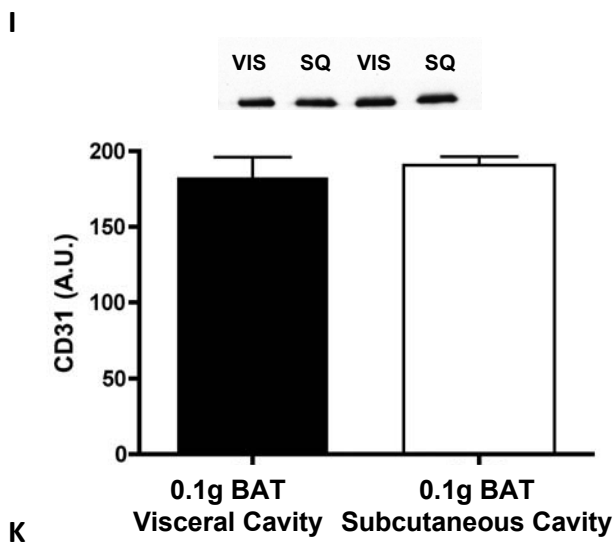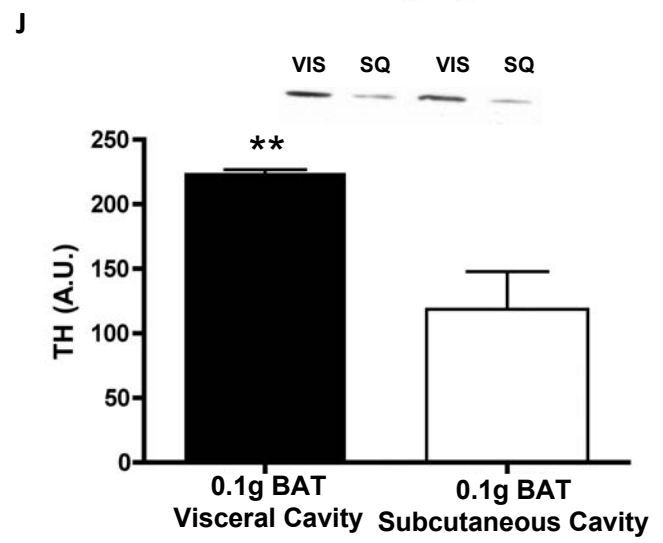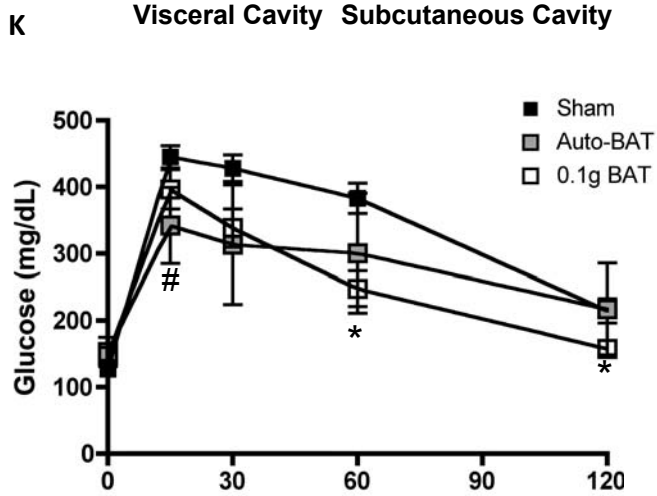

Supplemental Figure 2

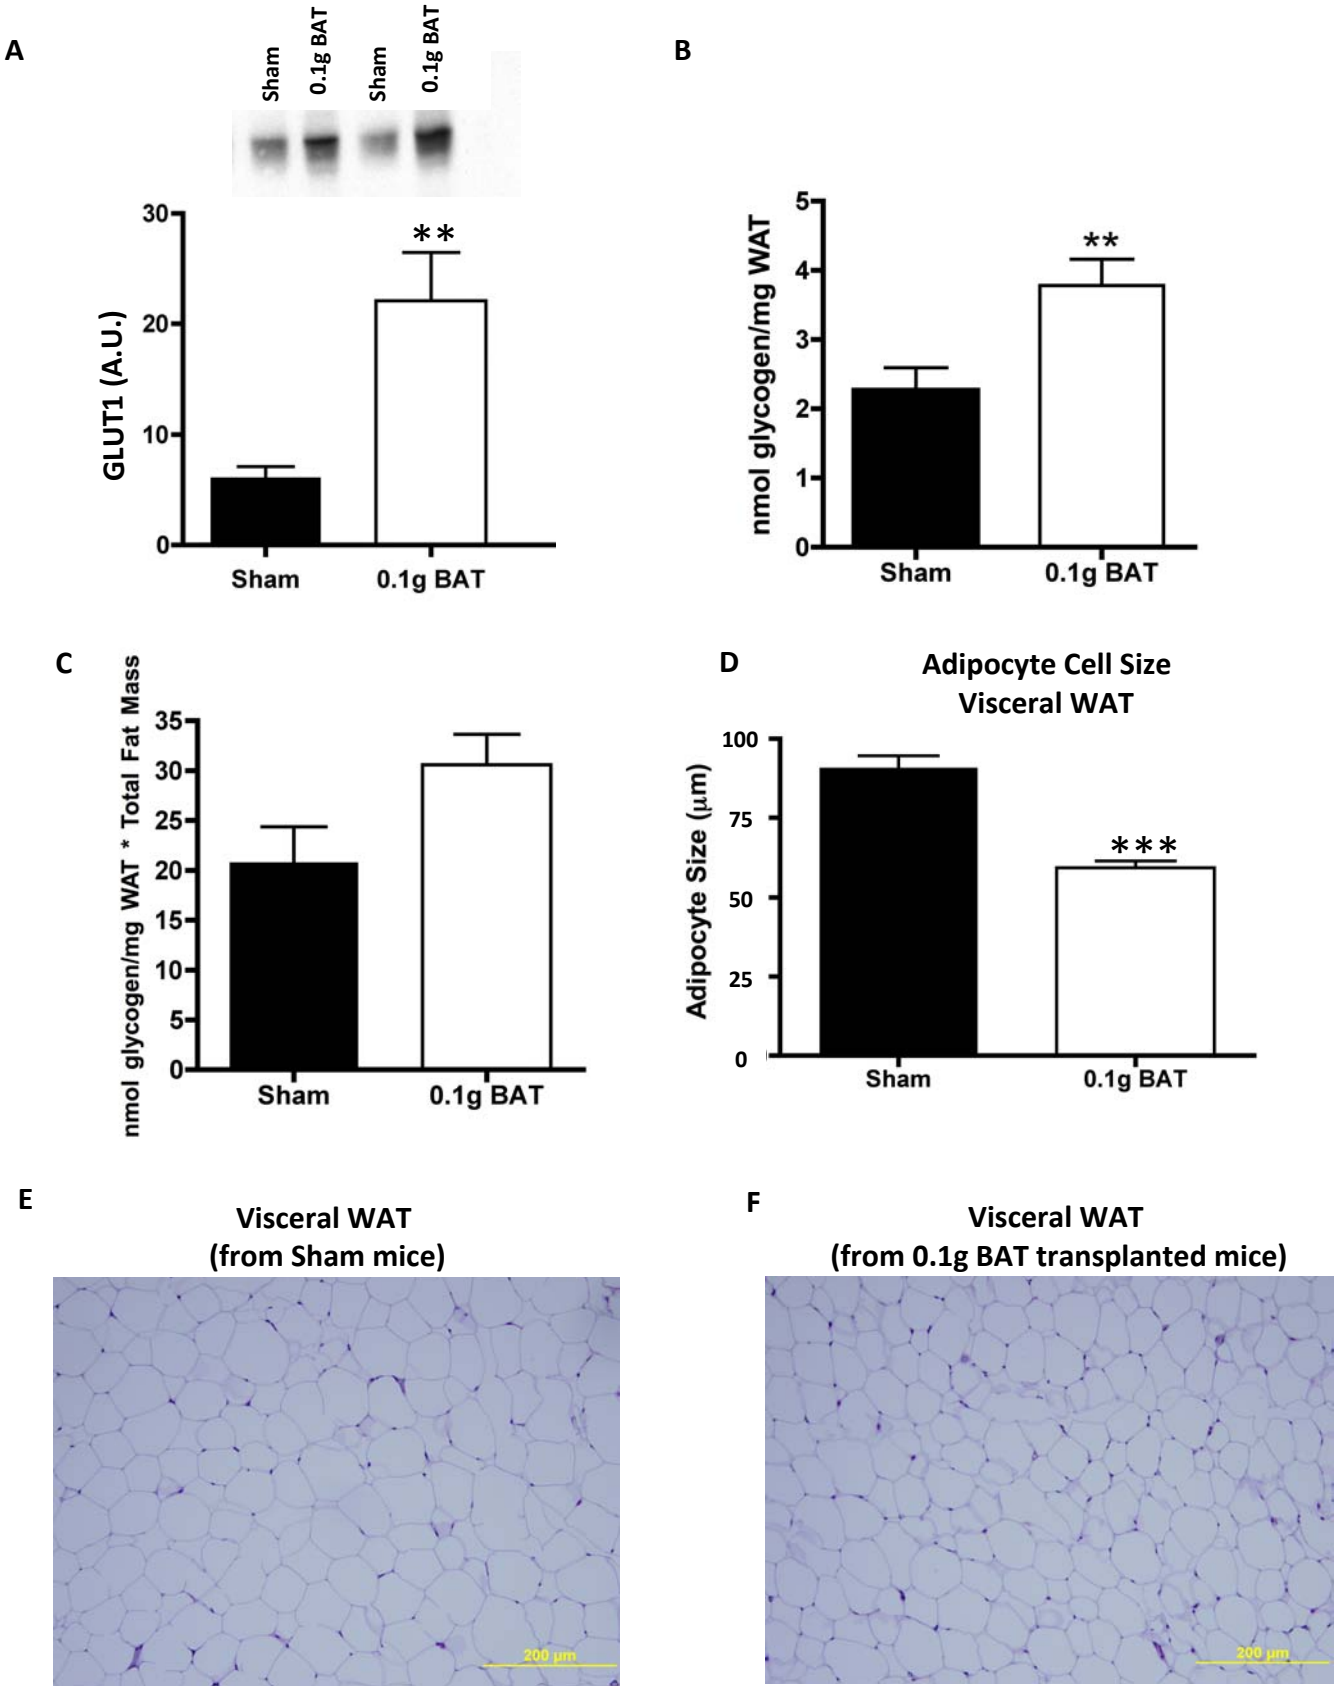

**G**

**Heart  
(from Sham mice)**

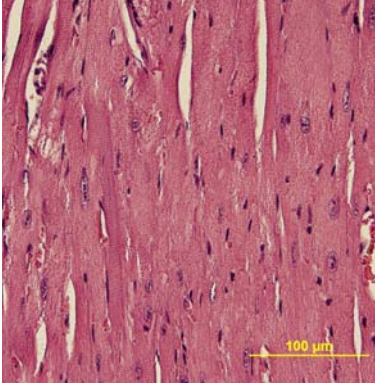

**Heart  
(from 0.1g BAT transplanted mice)**

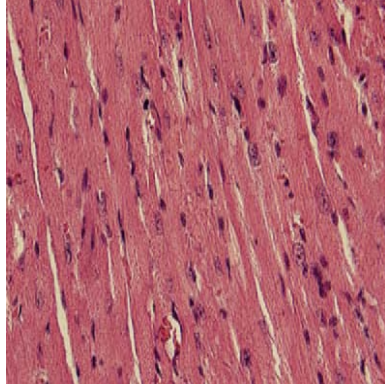

Supplemental Figure 3

A

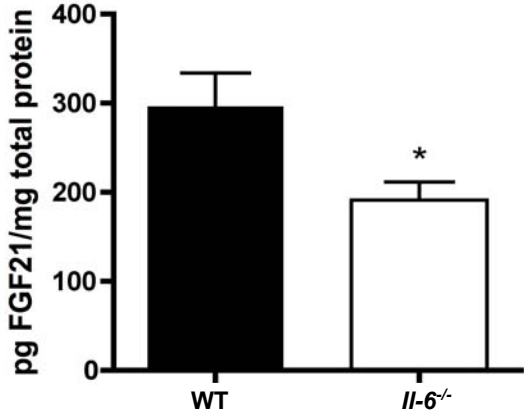

B

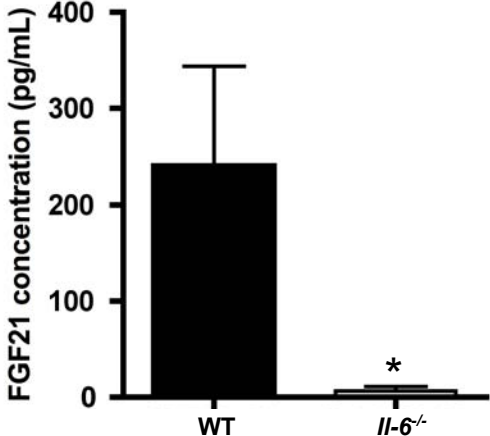

### Supplemental Figure 4

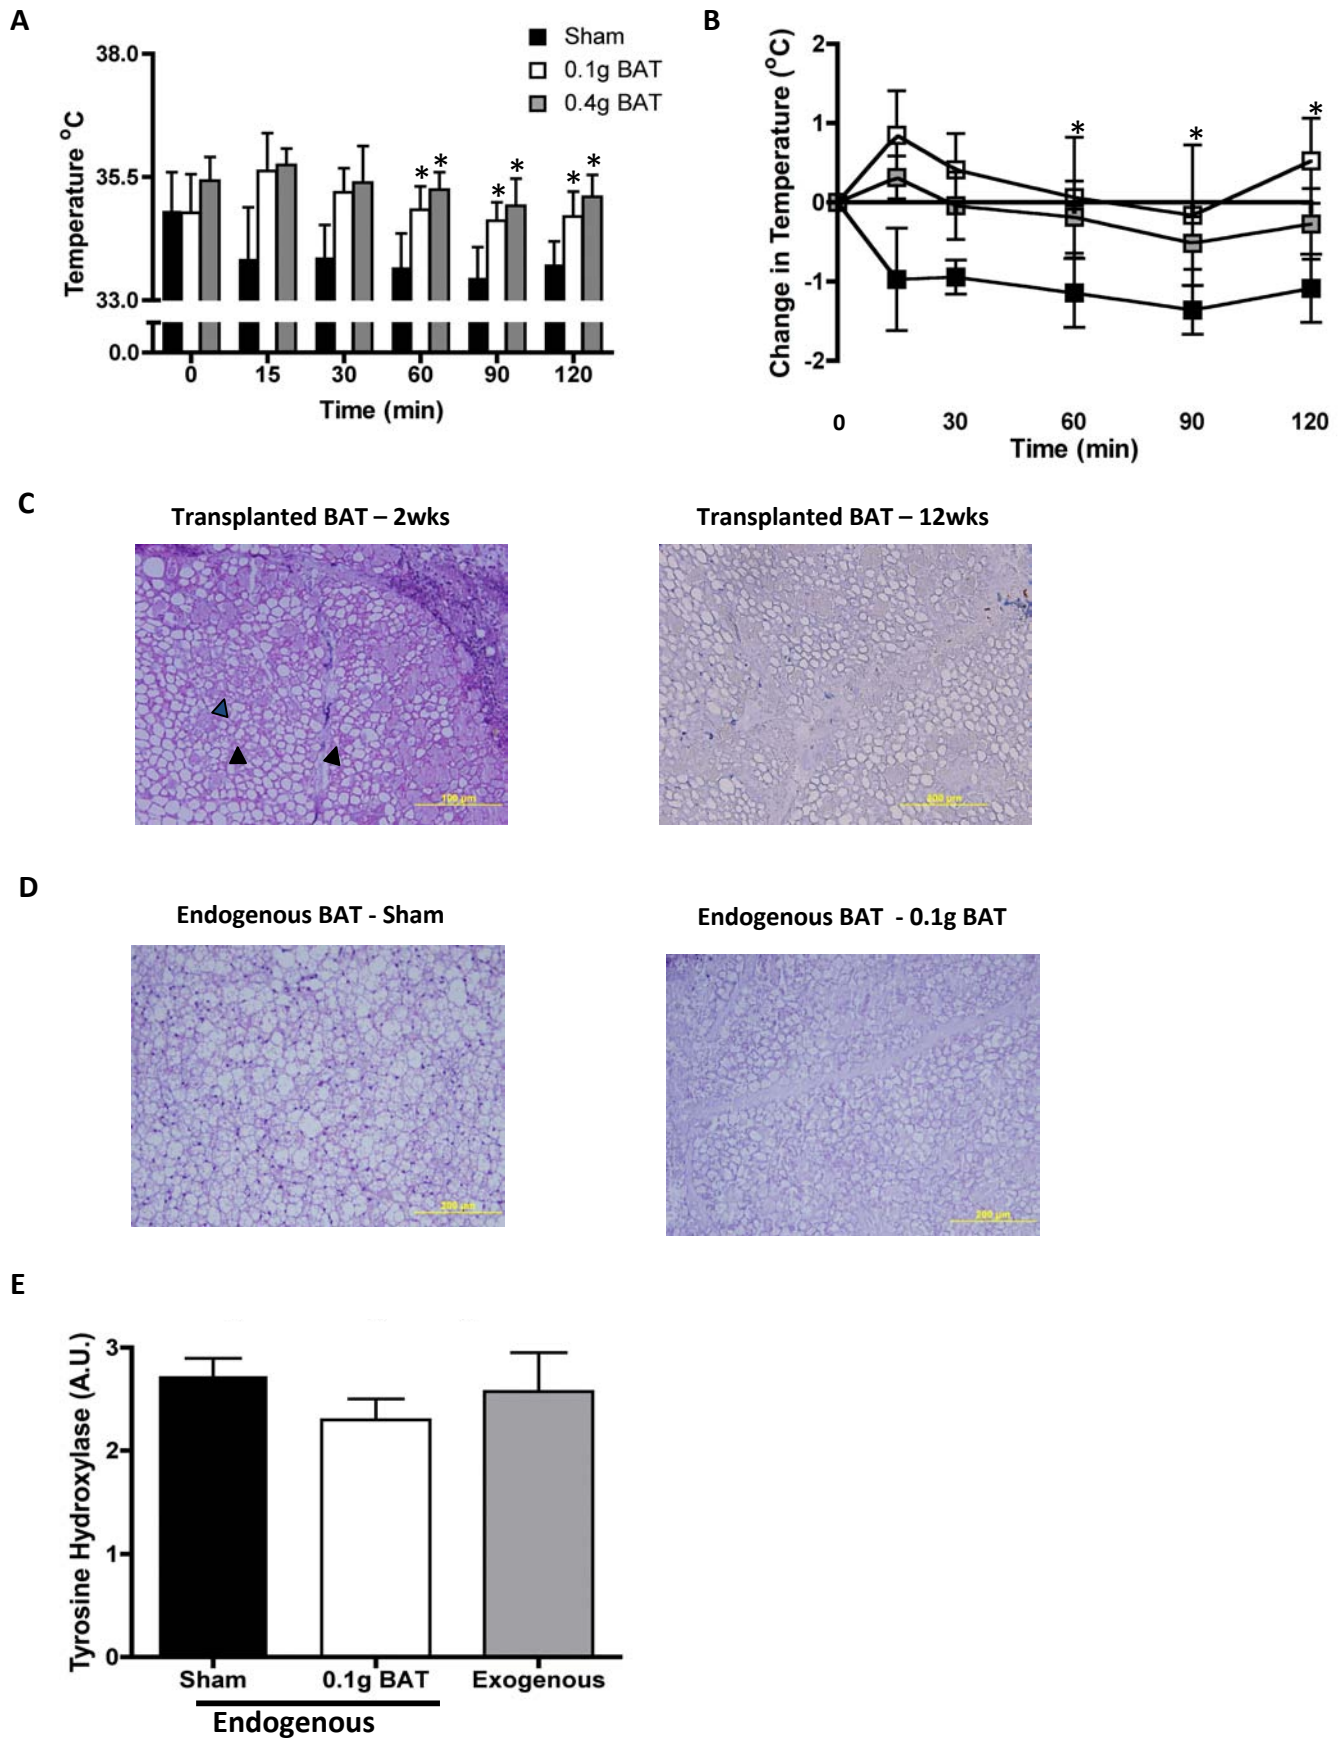



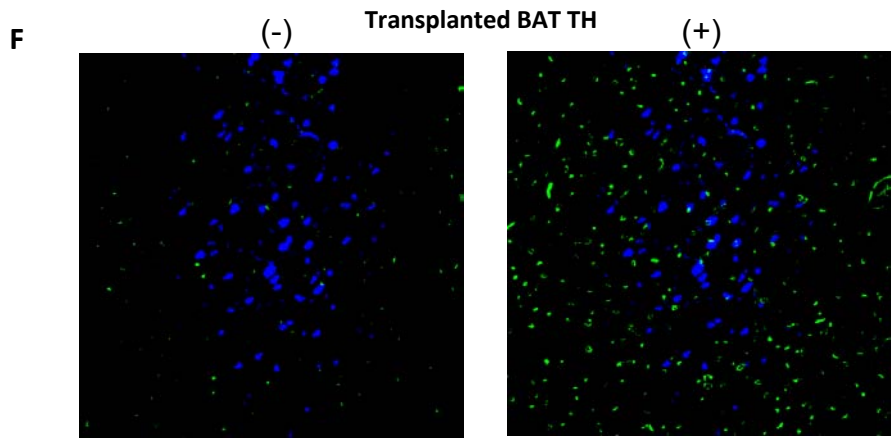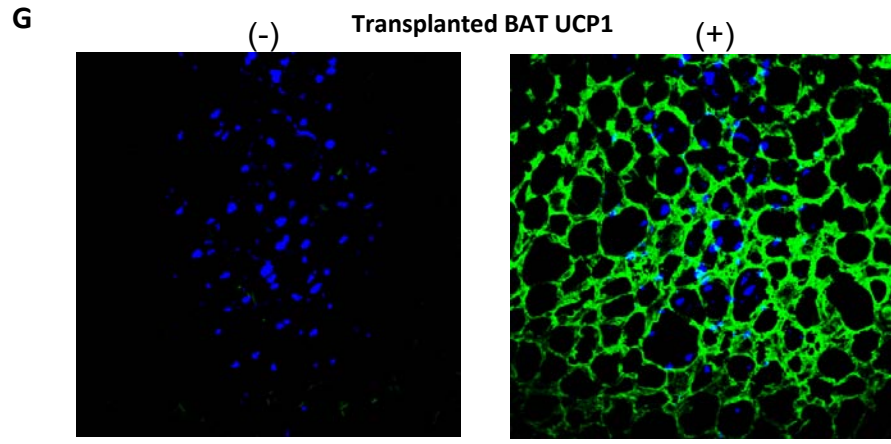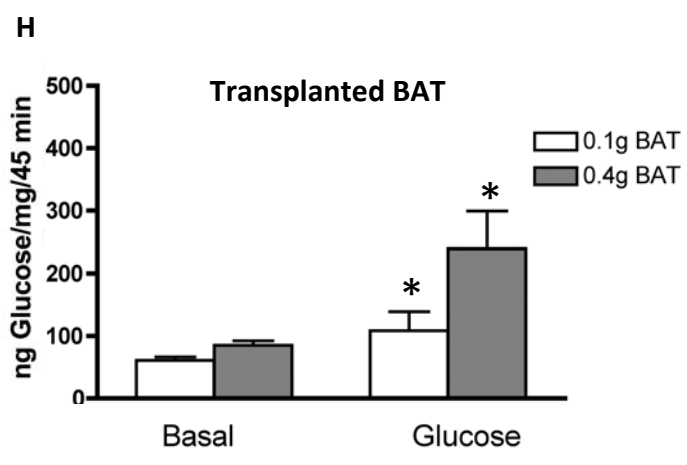

Supplement: sd1 [file 1]
